# Supplementary material
Source: publisher site journal article supplement (https://static.cambridge.org/content/id/urn:cambridge.org:id:article:S0016756820000400/resource/name/S0016756820000400supp002.xlsx)
Supplement: Supplementary file 2 [file S0016756820000400supp002.xlsx]

## Sheet: Sheet1
Geological Magazine: Late Jurassic Changmar Complex from the Shyok ophiolite, NW Himalaya: A prelude to the Ladakh Arc
Authors: Wanchese M. Saktura*1, Solomon Buckman1, Allen P. Nutman1 and Vickie C. Bennett2
Affiliations: (1) GeoQuEST Research Centre, School of Earth, Atmospheric and Life Sciences, University of Wollongong, Wollongong, NSW 2522, Australia (2) Research School of Earth Sciences, Australian National University, Canberra, ACT 2601, Australia
Supplementary Material
Hf reference zircons			July, 2017	ANU
ID	174Hf/177Hf	1SE	178Hf/177Hf	1SE	176Lu/177Hf	1SE	176Hf/177Hf	1SE	eHf	1SE
FC1.1.	0.008657	1.3e-05	1.4675	3.5e-05	0.001823	1e-06	0.282198	1e-05	-20.77	0.35
FC1.2.	0.00867	1.1e-05	1.46749	2.9e-05	0.00182	2.2e-05	0.282187	1.1e-05	-21.15	0.41
FC1.3.	0.008659	1.1e-05	1.46753	3.8e-05	0.001319	1e-06	0.282188	9e-06	-21.12	0.32
FC1.4.	0.008631	1.5e-05	1.46769	4.3e-05	0.001103	1.7e-05	0.28219	1.3e-05	-21.05	0.46
FC1.5.	0.008657	1.6e-05	1.46756	3.4e-05	0.00115	2.9e-05	0.282192	1.3e-05	-20.98	0.45
FC1.6	0.008669	9e-06	1.46754	3.8e-05	0.000852	3e-06	0.282185	9e-06	-21.22	0.33
FC1.7	0.008648	1.2e-05	1.46749	3.7e-05	0.00108	1e-06	0.28219	1.4e-05	-21.04	0.48
FC1.8	0.008631	1.6e-05	1.46756	4.4e-05	0.001838	3e-06	0.282197	1.6e-05	-20.8	0.57
Averages and 2 S.D. uncertainties this study					0.001373	0.000742	0.282191	8e-06	-21.0163	0.3
Accepted solution value (Woodhead and Hergt, 2005)					0.001262		0.282184	1.6e-05	-21.25	0.57
QGNG1	0.008647	1.1e-05	1.46744	3.5e-05	0.000802	2e-06	0.28162	9e-06	-41.21	0.32
QGNG2	0.008659	6e-06	1.46746	2.4e-05	0.000731	4e-06	0.281608	8e-06	-41.63	0.28
QGNG3	0.008661	9e-06	1.46754	4.3e-05	0.000836	4e-06	0.281595	1.1e-05	-42.07	0.38
QGNG4	0.008659	1e-05	1.46748	3.5e-05	0.000944	1e-06	0.281612	1e-05	-41.49	0.36
QGNG5	0.008657	1e-05	1.46752	3.3e-05	0.000875	2e-06	0.281604	1.1e-05	-41.76	0.37
QGNG6	0.008643	1e-05	1.46749	3.6e-05	0.000921	1e-06	0.281608	1.1e-05	-41.64	0.37
Averages and 2 S.D. uncertainties this study					0.000852	0.000144	0.281608	1.5e-05	-41.63	0.52
Accepted solution value (Woodhead and Hergt, 2005)					0.000731		0.281612	6e-06	-41.5	0.21
Plesovice
PLES1	0.008656	6e-06	1.46742	2.4e-05	7.8e-05	0	0.282478	9e-06	-10.86	0.33
PLES2	0.008675	7e-06	1.46744	2.7e-05	8.8e-05	0	0.282486	8e-06	-10.57	0.29
PLES3	0.008664	7e-06	1.46748	2.5e-05	9.6e-05	1e-06	0.282473	7e-06	-11.04	0.26
PLES4	0.008663	7e-06	1.46743	2.4e-05	9.3e-05	1e-06	0.282477	8e-06	-10.91	0.29
PLES5	0.008678	7e-06	1.4675	3e-05	0.0001	1e-06	0.282474	7e-06	-10.99	0.24
PLES6	0.008653	7e-06	1.46747	2.3e-05	0.000113	1e-06	0.28246	1e-05	-11.51	0.35
PLES7	0.008654	8e-06	1.46746	2.2e-05	0.000101	1e-06	0.282472	9e-06	-11.07	0.33
PLES8	0.00866	8e-06	1.46744	3e-05	5.8e-05	0	0.282474	8e-06	-11	0.27
PLES9	0.008664	7e-06	1.46746	3e-05	0.000101	0	0.282496	8e-06	-10.21	0.28
Averages and 2 S.D. uncertainties this study					9.2e-05	3e-05	0.282477	1.98746e-05	-10.9	0.67
Accepted solution value (Slama et al, 2008)							0.242482	±13 (2SD)	-10.82
Mud Tank
MUD1	0.008648	8e-06	1.46746	2.3e-05	0.000112	1e-06	0.282479	9e-06	-10.83	0.31
MUD2	0.008665	7e-06	1.4674	2.4e-05	0.000102	1e-06	0.282476	7e-06	-10.93	0.24
MUD3	0.008671	7e-06	1.46747	2.3e-05	0.000102	1e-06	0.282478	8e-06	-10.84	0.29
MUD4	0.008665	7e-06	1.46743	2.4e-05	2.2e-05	0	0.282507	8e-06	-9.83	0.28
MUD6	0.008659	5e-06	1.46744	2.4e-05	2.8e-05	0	0.2825	8e-06	-10.08	0.29
MUD7	0.008674	9e-06	1.46743	2.5e-05	2.4e-05	0	0.282508	9e-06	-9.8	0.31
MUD8.	0.008674	7e-06	1.46741	2.8e-05	2.1e-05	0	0.282523	8e-06	-9.27	0.3
MUD9	0.008682	6e-06	1.46744	2.5e-05	2.4e-05	0	0.282524	8e-06	-9.22	0.29
Averages and 2 S.D. uncertainties this study					5.4e-05	7.9e-05	0.282499	3.7e-05	-10.1	1.3
Accepted value (Woodhead and Hergt, 2005)					4.2e-05		0.282507	6e-06	-9.83	0.21
Monastery
Mon1.	0.00866	6e-06	1.46749	3.2e-05	1.3e-05	0	0.28272	8e-06	-2.31	0.29
Mon2.	0.008667	8e-06	1.46744	2.2e-05	1.3e-05	0	0.282726	8e-06	-2.1	0.28
Mon3.	0.008671	7e-06	1.46746	2.7e-05	8e-06	0	0.282715	1.1e-05	-2.48	0.38
Mon4.	0.008658	7e-06	1.46744	2.7e-05	1e-05	0	0.282729	8e-06	-1.98	0.27
Mon6.	0.008657	6e-06	1.46742	3e-05	1.3e-05	0	0.282723	9e-06	-2.19	0.31
Mon7.	0.008663	6e-06	1.46744	2.4e-05	1.3e-05	0	0.282742	7e-06	-1.53	0.24
Mon8.	0.008666	8e-06	1.46743	2.8e-05	1.3e-05	0	0.282737	8e-06	-1.71	0.29
Mon9.	0.00867	7e-06	1.46744	2.8e-05	9e-06	0	0.282753	8e-06	-1.13	0.29
Averages and 2 S.D. uncertainties this study					1.1e-05	4e-06	0.28273	2.4e-05	-1.93	0.83
Accepted value (Woodhead and Hergt, 2005)					9e-06		0.28273	8e-06	-1.66	0.57
Laser MC-ICPMS settings 4-5 July 2017
MC-ICPMS			Laser Ablation
Model	ThermoFinnigan Neptune		Type	193nm Ar-F excimer laser
Forward power	1200W		Model	HelEx
Mass resolution	low(400)		Repitition rate	5Hz
			Laser fluence	10 J/cm^2
			Spot size	square 42x42µm
Gas flow-laser ablation			Data Reduction
Cooling/ plasma (Ar)	1L/min		Primary Standard	NIST610
Sample cell gas (He)	0.5L/min		Yb Mass bias	173/171	1.13268
Nitrogen	4cc/min		Yb Interference	176/173	0.796218
